# **Clinical characteristics and valve lesions in rheumatic heart disease among children admitted to a selected tertiary teaching hospital in eastern Ethiopia.**

## **Authors**

**Temesgen Teferi Libe<sup>1\*</sup>, Yunus Edris Kelil<sup>1</sup>, Samrawit Abebaw Tegene<sup>2</sup>, Faisal Abdi<sup>2</sup>, Kibrom**

**Hailemariam Mesfin<sup>3</sup>**

## **Affiliations:**

<sup>1</sup> Department of Pediatrics and Child Health, College of Health and Medical Sciences, Haramaya University, Harar, Ethiopia.

<sup>2</sup>Hararghe Health Research, Haramaya University, Harar, Ethiopia.

<sup>3</sup>Maedot Charity Organization, Mekelle, Ethiopia

**\*Corresponding author:** Temesgen Teferi Libe (MD), School of Medicine, College of Health and Medical Sciences, Haramaya University Harar, Ethiopia, Email: [libe.temesgen.temesgen@gmail.com](mailto:libe.temesgen.temesgen@gmail.com), Tel: +251913730243, P.O Box 235 Harar, Ethiopia.

## Abstract

**Background:** Rheumatic heart disease remains a significant public health concern, especially among children in resource-limited settings like Ethiopia. Despite effective prevention strategies, RHD persists due to factors such as poverty and limited healthcare access. Understanding the clinical characteristics and valve lesions of rheumatic heart disease is crucial for improving diagnosis and management.

**Objective:** This study aimed to characterize the clinical features and valve lesions in children with rheumatic heart disease admitted to a tertiary teaching hospital in Eastern Ethiopia.

**Methods:** A hospital-based cross-sectional study was conducted from September 1, 2020, to August 31, 2021, at Hiwot Fana Comprehensive Specialized Hospital. Data were collected from medical records, clinical assessments, echocardiography reports, and laboratory tests. Descriptive statistics were used for analysis.

**Results:** A total of 39 children with rheumatic heart disease were included, predominantly females (71.8%). Shortness of breath (53.9%) and cough (38.5%) were common presenting symptoms. Acute decompensated heart failure (ADHF) was prevalent (89.7%). Mitral regurgitation (94.9%) and aortic regurgitation (66.7%) were frequent valve lesions. Other findings included mitral stenosis (56.4%) and left atrial enlargement (86.1%). Laboratory results showed mean hemoglobin of 10.29 g/dL and mean ESR of 45 mm/hr.

**Conclusions:** This study highlights the burden of RHD in Eastern Ethiopia, with advanced disease at presentation. Mitral and aortic valve lesions were predominant, emphasizing the need for early detection and comprehensive management strategies. Collaboration among healthcare providers and policymakers is essential to address the challenges of RHD in resource-limited settings.

**Keywords:** Rheumatic heart disease, clinical characteristics, valve lesions, Eastern Ethiopia

# **Introduction**

## **Background**

Rheumatic heart disease (RHD) remains a significant public health threat, particularly for children in developing countries like Ethiopia. It is a debilitating condition primarily affecting the heart valves, particularly the mitral and aortic valves, resulting from acute rheumatic fever (ARF), a complication of untreated streptococcal pharyngitis.(1) The global burden of RHD is immense, with developing nations disproportionately affected due to factors like poverty, overcrowding, and limited access to healthcare.(2, 3, 4, 5, 6, 7, 8, 9)

RHD is a significant contributor to the overall burden of acquired heart diseases worldwide, accounting for nearly half of all cardiovascular problems.(10) In 2015 alone, it was responsible for over 10 million disability-adjusted life-years and over 300,000 premature deaths.(2) Despite the existence of effective prevention strategies, RHD continues to disproportionately affect developing countries. Here, untreated ARF often progresses to RHD.(3, 4, 5, 6, 7, 8, 9, 10)

Patients with RHD often present with symptoms of heart failure, including shortness of breath, fatigue, and chest pain. In severe cases, RHD can lead to complications such as pulmonary arterial hypertension, arrhythmias, and infective endocarditis.(11, 12) Echocardiography plays a crucial role in diagnosing RHD, determining the location, type, and severity of valve lesions, and identifying associated complications.(11, 12, 13, 14)

Despite the substantial national burden of RHD, there is a scarcity of studies exploring the clinical characteristics and patterns of valve lesions in Ethiopia, particularly in the Eastern region. To our knowledge, no comprehensive research has been conducted in this specific

geographic area regarding valve lesion patterns and clinical characteristics. This study aims to address this critical knowledge gap by investigating RHD in Ethiopian children.

The lack of understanding concerning the specific clinical features and valve lesion patterns in this population hinders the development of tailored interventions, early detection, and optimal management of RHD. Healthcare providers, policymakers, and public health practitioners require a clearer picture to implement effective strategies for reducing the disease burden, associated morbidity, and mortality.

Therefore, this study aims to characterize the clinical features and valve lesion patterns in children with RHD. This knowledge will ultimately inform the development of evidence-based interventions and improved healthcare for this vulnerable population.

## **Objectives**

### **General Objective**

To determine the clinical characteristics and valve lesions in children with rheumatic heart disease admitted to a tertiary teaching hospital in eastern Ethiopia, from September 1, 2020, to August 31, 2021.

### **Specific objectives**

To describe the clinical characteristics of children admitted to a tertiary teaching hospital in eastern Ethiopia with a diagnosis of rheumatic heart disease.

To evaluate the patterns of valve lesions in children admitted to a tertiary teaching hospital in eastern Ethiopia with a diagnosis of rheumatic heart disease.

## **Methods and Materials**

### **Study area, design and period**

A hospital-based cross-sectional study design was used to prospectively study children admitted from September 01, 2020 to August 31, 2021 to pediatric ward and pediatrics ICU of Hiwot Fana Comprehensive Specialized Hospital (HFCSH). Hiwot Fana Comprehensive Specialized Hospital (HFCSH), Haramaya University's tertiary teaching hospital, is located in Harar and serves 5.8 million people, including the populations of Harari Region, Diredawa City Administration, Somali Region, and Eastern Hararghe Zone of Oromia Regional State. At HFCSH, Pediatric Ward and ICU accommodate 30 beds (6 in PICU and 24 in the Pediatric ward) with about 1,110 total admissions per year, among which about 79 had RHD diagnosis. (Health Management Information System data 2019; unpublished).

### **Patient involvement**

Patients were not directly involved in the design of this study.

### **Population and eligibility**

All children with RHD admitted to the pediatric ward and pediatric ICU of HFCSH from September 01, 2020 to August 31, 2021, by excluding repeat admissions and disappeared cases before obtaining adequate information.

### **Sample size determination and sampling technique**

Study population, and Sample size was calculated Using OpenEpi software by taking  $P=50\%$ ), with a 95% confidence level and the margin of error  $d=5\%$  (0.05). The sample size was determined to be 384. However, over the study period of one year, there were about 67 children with RHD admitted to pediatric ward and ICU. Thus, we decided to enroll all of these children to have more representative data. [Figure 1]

## **Data Collection Methods**

A comprehensive review of medical records for children with RHD admitted to the pediatric ward and ICU at Hiwot Fana Comprehensive Tertiary Teaching Hospital was conducted. This review included demographic information, clinical history, presenting symptoms, laboratory test results, chest X-ray findings, and echocardiography reports. A team of experienced pediatricians and cardiologists conducted standardized clinical assessments on each enrolled child, including a thorough physical examination, for cardiac symptom evaluation, vital sign measurement, and collection of additional clinical data. Pediatric cardiologists performed echocardiographic assessments adhering to standardized protocols to identify valve lesions and their characteristics. Additionally, laboratory data (complete blood count, erythrocyte sedimentation rate [ESR]), chest X-ray, and ECG were obtained.

## **Study Variables and measurements**

The outcome variables of this study were patterns of valve lesions and clinical characteristics of RHD. Independent variables included; socio-demographic variables; age, sex, address, ethnicity.

## **Operational definition**

**Pediatric patients:** Patients who are known to be less than 15 years of age.(15)

**RHD:** persistent damage to heart valves resulting in mitral and/or aortic regurgitation, or long-standing cases stenosis, which remains due to acute rheumatic fever with rheumatic carditis diagnosed by WHF criteria.(9, 16)

## **Data quality control**

The data collection tool was piloted on two RHD patients in the Jugol Hospital pediatric ward to assess its consistency, completeness, and ease of understanding. Two days of training were given

to both the data collectors and supervisor. The principal investigator closely monitored the data collection process to ensure completeness, accuracy, and data collection consistency. During sessions, thorough checking was done before analyzing the filled questionnaires. Two separate individuals conducted double data entry. When any gap was identified, it was communicated with data collectors daily. Following data entry, the dataset was reviewed for completeness and any missing data points were addressed.

### **Data Processing and Analysis**

After data collection, each questionnaire was checked thoroughly for completeness. The data was then coded using a standardized coding scheme and double-entered into EpiData version 3.1. Subsequently, the data was transferred to Stata version 14.2 for statistical analysis. Descriptive statistics, including frequency, proportions, means, and standard deviation were computed.

### **Ethical consideration**

Ethical clearance was obtained from Haramaya University College of Health and Medical Sciences Institution Health Research Ethical Review Committee (with ethical approval ref.no: IHRERC/245/2020). An official letter was sent to Hiwot Fana Comprehensive Specialized Hospital. This study was conducted in accordance with the Declaration of Helsinki. Data collection was started after the study protocol participants (mothers of children) under the age of 18 years were reviewed and approved by the IRB of Haramaya University to provide informed consent on their own behalf.

Permissions were obtained from hospital managers/medical directors and after written or (verbal for those unable to read and write) informed consent was obtained from mothers of the baby. The purpose of the study was briefly explained to the children's mothers/care givers. Data that were

collected from the participants were kept in secured and order to maintain confidentiality.

Voluntary participation was ensured and participants were free to out.

## **Result**

### **Baseline Characteristics**

A total of 39 children with RHD were enrolled in the study. The majority (71.8%, n=28) were females, and the remaining participants (28.2%, n=11) were males. The mean age of the children was 10 years (SD  $\pm$  2.6 years).

### **Clinical characteristics**

Fourteen children had a known diagnosis of RHD, and 25 were newly diagnosed. Shortness of breath (53.9%) was the most frequent presenting complaint, followed by cough (38.5%). Among the 14 children with a known diagnosis of RHD, only 2 (14.3%) were adherent to secondary prophylaxis, while 6 (42.9%) were non-adherent and the remaining 6 (42.9%) had never taken prophylaxis.

Shortness of breath (53.9%) was the most frequent presenting complaint, followed by cough (38.5%) and other symptoms.

Ten (25.6%) children had at least one comorbidity. The most frequent comorbidities were severe acute malnutrition (5; 12.8%) and severe anemia (Hb < 7 gm/dl; 5; 12.8%). [Table 2]

A significant proportion of patients (35 out of 39, or 89.7%) presented with acute decompensated heart failure (ADHF) upon admission.

The most frequent identified trigger was pneumonia, affecting 21 patients (60% of ADHF patients). One patient (3% of ADHF patients) had atrial fibrillation as a possible contributing factor. Four patients (11% of ADHF patients) experienced a recurrence of rheumatic disease,



potentially contributing to their heart failure. Five patients (14% of ADHF patients) had confirmed or suspected infective endocarditis, which could have exacerbated their heart failure.

### **Vital signs and Anthropometry**

The mean pulse rate was 115.25 beats per minute (bpm) with a standard deviation (SD) of 19.44 bpm (range: 60-178 bpm). The mean respiratory rate was 37.46 breaths per minute (bpm) with an SD of 13.49 bpm (range: 18-72 bpm). The mean body temperature was 36.94°C (SD  $\pm$  1.05°C; range: 32-38.7°C). Mean oxygen saturation on room air was 94.3% (SD  $\pm$  3.5%; range: 86-99%). The mean body mass index (BMI) was 14.56 kg/m<sup>2</sup> (SD  $\pm$  3.1 kg/m<sup>2</sup>; range: 11.3-28.2 kg/m<sup>2</sup>). [Table 3]

According to WHO Z-scores for age, 5 (12.8%) children were severely wasted (< -3 Z-score), 12 (30.8%) were moderately wasted (-3 to -2 Z-score), 21 (53.8%) had normal weight (-2 to +2 Z-score), and 1 (2.6%) was overweight (>+2 Z-score). [Figure 2]

### **Chest examination**

At least one abnormal chest examination finding was present in 24 (61.5%) children. The most common findings were crepitations (41.0%), decreased or absent air entry (39.5%), dullness (39.5%), and wheezing (9.3%). [Table 4]

### **Cardiac examination**

The point of maximal impulse (PMI) was displaced downward and to the left in 28 (71.8%) children, while it was in the normal position in 9 (23.1%) and on the left lower sternal border in 2 (5.1%).

Apical heave (61.5%) and parasternal heave (56.4%) were the most frequent abnormal cardiac examination findings. P2 heart sound was accentuated in 28 (77.8%) children. A third heart

sound (S3 gallop) was present in 5 (12.8%) children. Almost all children (97.4%) had a significant murmur on cardiac auscultation. [Table 5]

### **Abdomen and integumentary examination**

Hepatomegaly was present in 17 (43.6%) children, while ascites (fluid collection in the abdomen) was detected in 14 (35.9%). Peripheral edema was observed in 8 (20.5%). [Table 6]

### **Laboratory findings**

Laboratory analysis revealed the following: mean hemoglobin (Hb) concentration was 10.29 g/dL (SD  $\pm$  2.67 g/dL; range, 3.9-17.6 g/dL), mean erythrocyte sedimentation rate (ESR) was 45 mm/hr (SD  $\pm$  33.58 mm/hr; range, 1-140 mm/hr), and mean serum creatinine level was 0.53 mg/dL (SD  $\pm$  0.265 mg/dL; range, 0.1-1.1 mg/dL).[Table 7]

### **Chest x ray findings**

Chest X-ray revealed abnormal findings in a significant proportion of participants. Left atrial enlargement was the most frequent abnormality, observed in 86.1% (31/36) of patients. Other findings included cardiomegaly (80.6%), pulmonary edema (26.5%), signs suggestive of pulmonary arterial hypertension (PAH; 36.7%), and pleural effusion (24.2%). [Table 8]

### **Echocardiographic Findings in RHD Patients**

Echocardiography revealed significant valvular involvement in a vast majority of patients with RHD.

All 39 patients had evidence of mitral valve involvement. The most frequent finding was mitral regurgitation (MR), present in 37 patients (94.9%). The severity of MR varied: 3 patients (7.7%) had mild MR, 7 patients (17.9%) had moderate MR, and 27 patients (69.2%) had severe MR. Mitral stenosis (MS) was identified in a subset of patients (22/39, 56.4%). The severity of MS

also varied: 9 patients (23.1%) had mild MS, 6 patients (15.4%) had moderate MS, and 7 patients (17.9%) had severe MS. Notably, 20 patients (51.3%) had both MR and MS present concurrently. However, it's important to note that 2 patients (5.1%) had isolated MS without MR. [Table 9]

A substantial portion of patients (26 out of 39, or 66.7%) had aortic valve involvement. Similar to the mitral valve, the severity of aortic regurgitation (AR) varied. Fourteen patients (35.9%) had mild AR, 11 patients (28.2%) had moderate AR, and only 1 patient (2.6%) had severe AR. Interestingly, only 1 patient (2.6%) had aortic stenosis (AS), and it was severe. It's important to note that this severe AS co-existed with MR, highlighting a potential link between these valve dysfunctions in some cases. [Table 10]

Pulmonic valve involvement was less frequent compared to the mitral and aortic valves. Only 7 patients (17.9%) had pulmonic regurgitation, and no patients had pulmonic stenosis. [Table 11]

The pressure gradient measured across the tricuspid valve averaged 27.17 mmHg, with some variation (standard deviation of 19.734 mmHg).

Right atrial size varied among patients. Normal size was observed in nearly 40% (15 patients), while mild, moderate, and severe dilation were identified in 21%, 37%, and 2.6% of patients, respectively. Similarly, right ventricular size varied, with normal dimensions in almost half (47%) of patients. Mild and moderate dilation were seen in 18% and 34% of patients, respectively. Data for one patient's right ventricle was missing.

Left atrial size also showed variation. Most patients had either moderate (47%) or severe (45%) dilation. Only a small portion (8%) had mildly dilated left atria, and normal size was uncommon (observed in just 4 patients). Left ventricular size followed a similar pattern, with the majority of

patients having moderate (34%) or severe (39%) dilation. Normal size was seen in less than 20% of patients, and mild dilation was identified in another 8%.

One important finding was the presence of a thrombus in a single patient (2.56%). Notably, left ventricular function remained normal in all cases, despite the observed chamber size variations.

## Discussion

This study investigated the clinical characteristics and valve lesion patterns of rheumatic heart disease (RHD) in a resource-limited setting in Eastern Ethiopia. Our findings offer valuable insights into the burden and presentation of RHD in this understudied population.

The results highlight the persistent burden of RHD, with a majority of affected children being young and predominantly female. Shortness of breath and cough were the most frequent presenting symptoms, indicating a significant impact on their quality of life. Furthermore, a substantial proportion of patients presented with advanced disease, indicated by acute decompensated heart failure (ADHF) at admission. These observations emphasize the urgent need for improved strategies for early detection and management of RHD in resource-limited settings like Eastern Ethiopia. This includes health education initiatives and promoting better healthcare utilization.

Our findings are consistent with previous studies in Ethiopia and other low-resource settings, which consistently report a high burden of RHD in children, often presenting at advanced stages. (6, 9, 11, 12, 17) The predominance of mitral regurgitation and aortic regurgitation as the most prevalent valve lesions aligns with existing literature, underlining the extensive valvular damage associated with pediatric RHD. (9, 17, 18) However, this study provides novel insights into the specific clinical characteristics and prevalent valve lesions in Eastern Ethiopia, contributing to a more comprehensive understanding of RHD epidemiology in this region.

The high prevalence of ADHF and significant valvular involvement observed in our study have significant implications for clinical practice and public health policies in Ethiopia. Healthcare providers need to be alert for symptoms suggestive of RHD, particularly in children from vulnerable populations. Early screening and diagnosis should be prioritized to facilitate timely

intervention. Additionally, efforts to improve access to secondary prophylaxis and implement comprehensive RHD control programs are crucial to reduce disease burden and improve long-term outcomes for affected children. These findings underscore the need for multidisciplinary collaboration between healthcare professionals, policymakers, and community stakeholders. This collaboration is essential to develop and implement effective strategies for RHD prevention, diagnosis, and management in resource-limited settings.

### **Limitations**

Several limitations should be considered when interpreting the findings of this study. Firstly, the relatively small sample size and single-center design may limit the generalizability of our results to other settings within Ethiopia and beyond. Furthermore, the lack of long-term follow-up data precludes a comprehensive assessment of treatment outcomes and disease progression in this population. Future studies with larger sample sizes, prospective designs, and longer follow-up periods are needed to address these limitations and provide a more robust understanding of RHD epidemiology and outcomes in Eastern Ethiopia.

### **Conclusion:**

In conclusion, this study provides valuable insights into the clinical characteristics and valve lesions in RHD among children in Eastern Ethiopia. The findings underscore the persistent burden of RHD in this region and highlight the urgent need for improved early detection, diagnosis, and management strategies. Healthcare providers, policymakers, and researchers must collaborate to develop and implement comprehensive RHD control programs tailored to the unique challenges faced by resource-limited settings like Eastern Ethiopia. By addressing these challenges and prioritizing RHD prevention and management, we can mitigate the morbidity and

mortality associated with this preventable yet devastating disease among vulnerable pediatric populations.

### **Data Sharing Statement**

Any of the data used for analysis in the study is available from the corresponding author and ready to be provided up on reasonable request.

### **Contributors**

Conceptualization: Temesgen T Libe, Yunus E Kelil, Samrawit Abebaw, Faisel, and Kibrom Mesfin; formal analysis: Temesgen T Libe, Faisel, and Yunus E Kelil; investigation: Temesgen T Libe, Faisel, Yunus E Kelil, Samrawit Abebaw, and Kibrom; methodology: Temesgen T Libe, Faisel, and Kibrom; Validation: Temesgen T Libe, Faisel, and Kibrom, Yunus E Kelil and Samrawit Abebaw; writing the original draft: Temesgen T Libe, and Samrawit Abebaw.

### **Acknowledgments**

We are very grateful to the Haramaya University College of Health and Medical Sciences for its ethical clearance provision and financial support. We also acknowledge our study participants, data collectors and supervisors for enabling us to realize this research work.

### **Funding**

The thesis was funded by Haramaya University.

### **Disclosure**

The authors declared that they have no conflicts of interest.

## References

1. Kliegman RM, St Geme, J. W. Nelson Textbook of Pediatrics E-Book: Elsevier Health Sciences; 2019.
2. Watkins DA, Johnson CO, Colquhoun SM, Karthikeyan G, Beaton A, Bukhman G, et al. Global, Regional, and National Burden of Rheumatic Heart Disease, 1990-2015. *N Engl J Med*. 2017;377(8):713-22.
3. Cilliers AM. Rheumatic fever and rheumatic heart disease in Africa. *S Afr Med J*. 2015;105(5):361-2.
4. Arvind B, Ramakrishnan S. Rheumatic Fever and Rheumatic Heart Disease in Children. *Indian J Pediatr*. 2020;87(4):305-11.
5. Carapetis JR, Beaton A, Cunningham MW, Guilherme L, Karthikeyan G, Mayosi BM, et al. Acute rheumatic fever and rheumatic heart disease. *Nat Rev Dis Primers*. 2016;2:15084.
6. Zühlke L, Engel ME, Karthikeyan G, Rangarajan S, Mackie P, Cupido B, et al. Characteristics, complications, and gaps in evidence-based interventions in rheumatic heart disease: the Global Rheumatic Heart Disease Registry (the REMEDY study). *Eur Heart J*. 2015;36(18):1115-22a.
7. Condemni F, Rossi G, Lupiz M, Pagano A, Zamatto F, Marini S, et al. Screening of asymptomatic rheumatic heart disease among refugee/migrant children and youths in Italy. *Pediatr Rheumatol Online J*. 2019;17(1):12.
8. Roberts K, Cannon J, Atkinson D, Brown A, Maguire G, Remenyi B, et al. Echocardiographic Screening for Rheumatic Heart Disease in Indigenous Australian Children: A Cost-Utility Analysis. *J Am Heart Assoc*. 2017;6(3).



9. Sani MU, Karaye KM, Borodo MM. Prevalence and pattern of rheumatic heart disease in the Nigerian savannah: an echocardiographic study. *Cardiovasc J Afr.* 2007;18(5):295-9.
10. Karthikeyan G, Connolly SJ, Ntsekhe M, Benz A, Rangarajan S, Lewis G, et al. The INVICTUS rheumatic heart disease research program: Rationale, design and baseline characteristics of a randomized trial of rivaroxaban compared to vitamin K antagonists in rheumatic valvular disease and atrial fibrillation. *Am Heart J.* 2020;225:69-77.
11. Animasahun BA, Madise Wobo AD, Itiola AY, Adekunle MO, Kusimo OY, Thomas FB. The burden of rheumatic heart disease among children in Lagos: how are we fairing? *Pan Afr Med J.* 2018;29:150.
12. Marijon E, Ou P, Celermajer DS, Ferreira B, Mocumbi AO, Jani D, et al. Prevalence of rheumatic heart disease detected by echocardiographic screening. *N Engl J Med.* 2007;357(5):470-6.
13. Guilherme L, Cury P, Demarchi LM, Coelho V, Abel L, Lopez AP, et al. Rheumatic heart disease: proinflammatory cytokines play a role in the progression and maintenance of valvular lesions. *Am J Pathol.* 2004;165(5):1583-91.
14. Guilherme L, Köhler KF, Postol E, Kalil J. Genes, autoimmunity and pathogenesis of rheumatic heart disease. *Ann Pediatr Cardiol.* 2011;4(1):13-21.
15. Abdwani R. Pediatric Rheumatology. In: Almoallim H, Cheikh M, editors. *Skills in Rheumatology*. Singapore: Springer  
  
Copyright 2021, The Author(s). 2021. p. 501-18.
16. Reményi B, Wilson N, Steer A, Ferreira B, Kado J, Kumar K, et al. World Heart Federation criteria for echocardiographic diagnosis of rheumatic heart disease--an evidence-based guideline. *Nat Rev Cardiol.* 2012;9(5):297-309.

17. Tantchou Tchoumi JC, Butera G. Rheumatic valvulopathies occurrence, pattern and follow-up in rural area: the experience of the Shisong Hospital, Cameroon. Bull Soc Pathol Exot. 2009;102(3):155-8.
18. Koirala PC, Sah RK, Sharma D. Pattern of rheumatic heart disease in patients admitted at tertiary care centre of Nepal. Nepalese Heart Journal. 2018;15(1):29-33.

## Tables

Table 1 Baseline Characteristics of RHD patients

|    |                     |                  |                   |
|----|---------------------|------------------|-------------------|
| 1. | <b>Sex</b>          | <b>Frequency</b> | <b>Percentage</b> |
|    | Male                | 11               | 28.21%            |
|    | Female              | 28               | 71.79%            |
|    | Total               | 39               | 100%              |
| 2. | <b>Age in years</b> |                  |                   |
|    | Mean                | 10               |                   |
|    | SD                  | 2.6              |                   |
|    | Min                 | 5                |                   |
|    | Max                 | 14               |                   |

Table 2 clinical characteristics of RHD patients

|    |                        |             |                |
|----|------------------------|-------------|----------------|
| 1. | <b>Chief Complaint</b> | <b>Freq</b> | <b>Percent</b> |
|    | Cough                  | 15          | 38.46          |
|    | Shortness of breath    | 21          | 53.85          |
|    | Other                  | 3           | 7.69           |
|    | Total                  | 39          | 100            |

|    |                                 |      |         |
|----|---------------------------------|------|---------|
| 2. | <b>RHD status</b>               | Freq | Percent |
|    | New                             | 25   | 64.1    |
|    | Known                           | 14   | 35.9    |
|    | Total                           | 39   | 100     |
| 3. | <b>Adherence to prophylaxis</b> | Freq | Percent |
|    | Adherent                        | 2    | 14.29   |
|    | Not Adherent                    | 6    | 42.86   |
|    | Not taking prophylaxis          | 6    | 42.86   |
|    | Total                           | 14   | 100     |

Table 3 Vital sign and BMI distribution of RHD patients

| Variable            | Mean   | SD    | Min | Max  |
|---------------------|--------|-------|-----|------|
| Pulse rate          | 115.25 | 19.44 | 60  | 178  |
| Respiratory<br>Rate | 37.46  | 13.49 | 18  | 72   |
| Temperature         | 36.94  | 1.05  | 32  | 38.7 |
| Saturation          | 94.3   | 3.5   | 86  | 99   |

|     |       |     |      |      |
|-----|-------|-----|------|------|
| BMI | 14.56 | 3.1 | 11.3 | 28.2 |
|-----|-------|-----|------|------|

Table 4 Chest examination findings of RHD patients

| <b>Chest findings</b>         | <b>Freq</b> | <b>Percent</b> |
|-------------------------------|-------------|----------------|
| At least one finding          | 24          | 61.54          |
| Crepitation                   | 16          | 41.03          |
| Decreased or absent air entry | 17          | 39.53          |
| Dullness                      | 17          | 39.53          |
| Wheezing                      | 4           | 9.3            |

Table 5 Cardiac examination findings

|                                 |                                  | <b>Freq.</b> | <b>Percent</b> |
|---------------------------------|----------------------------------|--------------|----------------|
| <b>Point of Maximum impulse</b> | Normal position                  | 9            | 23.08          |
|                                 | On left lower sternal            | 2            | 5.13           |
|                                 | Deviated to left and/or downward | 28           | 71.79          |
|                                 | Total                            | 39           | 100            |
|                                 |                                  |              |                |
| <b>Apical Heave</b>             | Yes                              | 24           | 61.54          |
|                                 | No                               | 15           | 38.46          |
|                                 | Total                            | 39           | 100            |
| <b>Parasternal heave</b>        | Yes                              | 22           | 56.41          |
|                                 | No                               | 17           | 43.59          |
|                                 | Total                            | 39           | 100            |
| <b>P2_accentuated</b>           | Yes                              | 28           | 77.78          |
|                                 | No                               | 8            | 22.22          |
|                                 | Total                            | 36           | 100            |
| <b>S3 gallop</b>                | Yes                              | 5            | 12.82          |
|                                 | No                               | 34           | 87.18          |
|                                 | Total                            | 39           | 100            |
| <b>Murmur</b>                   | Yes                              | 38           | 97.44          |

|  |       |    |      |
|--|-------|----|------|
|  | No    | 1  | 2.56 |
|  | Total | 39 | 100  |

Table 6 Abdomen and integumentary

| Variable                |       | Freq | Percent |
|-------------------------|-------|------|---------|
| <b>Hepatomegaly</b>     | Yes   | 17   | 43.59   |
|                         | No    | 22   | 56.41   |
|                         | Total | 39   | 100     |
| <b>Ascites</b>          |       | Freq | Percent |
|                         | Yes   | 14   | 35.9    |
|                         | No    | 25   | 64.1    |
|                         | Total | 39   | 100     |
| <b>Peripheral edema</b> | Yes   | 8    | 20.51   |
|                         | No    | 31   | 79.49   |
|                         | Total | 39   | 100     |

Table 7 Laboratory test results

| Laboratory Test | Mean (SD)                | Range         |
|-----------------|--------------------------|---------------|
| Hemoglobin (Hb) | 10.29 g/dL (2.67 g/dL)   | 3.9-17.6 g/dL |
| ESR             | 45 mm/hr (33.58 mm/hr)   | 1-140 mm/hr   |
| Creatinine      | 0.53 mg/dL (0.265 mg/dL) | 0.1-1.1 mg/dL |

Table 8 Chest X-Ray Findings

| Chest X-Ray Finding                                       | Frequency (%) | Number of Patients (n=36) |
|-----------------------------------------------------------|---------------|---------------------------|
| Left Atrial Enlargement (LAE)                             | 86.1          | 31                        |
| Cardiomegaly                                              | 80.6          | 29                        |
| Pulmonary Edema (PE)                                      | 26.5          | 9                         |
| Signs suggestive of Pulmonary Arterial Hypertension (PAH) | 36.7          | 11                        |
| Pleural Effusion                                          | 24.2          | 8                         |
| Pneumonia                                                 | 21.2          | 7                         |

Table 9 Mitral Valve Findings (n=39)

| Feature                   | Frequency | Percent (%) |
|---------------------------|-----------|-------------|
| Mitral Regurgitation (MR) |           |             |



|                             |    |       |
|-----------------------------|----|-------|
| No                          | 2  | 5.13  |
| Mild                        | 3  | 7.69  |
| Moderate                    | 7  | 17.95 |
| Severe                      | 27 | 69.23 |
| <b>Mitral Stenosis (MS)</b> |    |       |
| No                          | 17 | 43.59 |
| Mild                        | 9  | 23.08 |
| Moderate                    | 6  | 15.38 |
| Severe                      | 7  | 17.95 |
| <b>Combined MR &amp; MS</b> | 20 | 51.3  |

Table 10 Aortic Valve Findings (n=39)

| Feature                          | Frequency | Percent (%) |
|----------------------------------|-----------|-------------|
| <b>Aortic Regurgitation (AR)</b> |           |             |
| No                               | 13        | 33.33       |
| Mild                             | 14        | 35.9        |
| Moderate                         | 11        | 28.21       |
| Severe                           | 1         | 2.56        |
| <b>Aortic Stenosis (AS)</b>      |           |             |
| No                               | 38        | 97.44       |

|        |   |      |
|--------|---|------|
| Severe | 1 | 2.56 |
|--------|---|------|

Table 11 Pulmonic Valve Findings (n=39)

| Feature                | Frequency | Percent (%) |
|------------------------|-----------|-------------|
| Pulmonic Regurgitation | 7         | 17.95       |
| No Regurgitation       | 32        | 82.05       |

Table 12 Precipitating Conditions of Heart Failure in RHD

| Precipitating Condition                         | Frequency | Percent of ADHF Patients |
|-------------------------------------------------|-----------|--------------------------|
| Pneumonia                                       | 21        | 60%                      |
| Atrial fibrillation                             | 1         | 3%                       |
| Rheumatic recurrence                            | 4         | 11%                      |
| Infective endocarditis (confirmed or suspected) | 5         | 14%                      |

## Figures

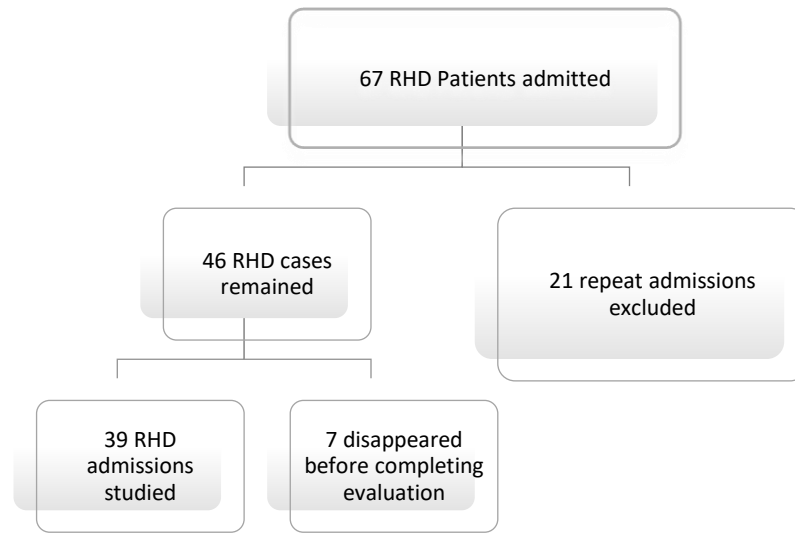

Figure 3 Sampling procedure

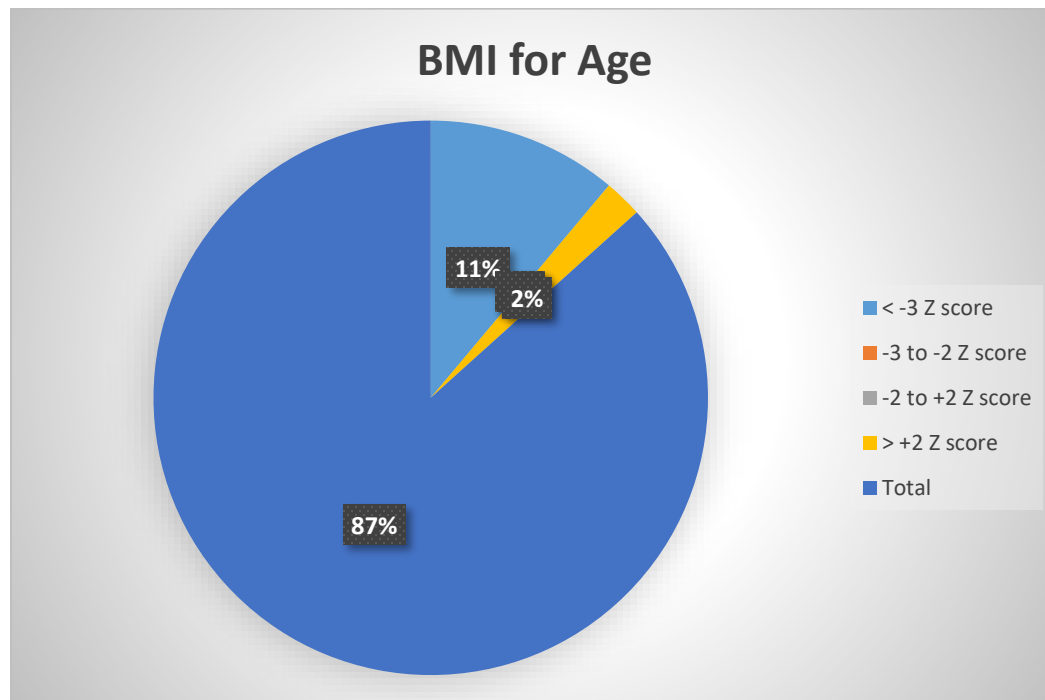

Figure 4 BMI for age distribution of RHD patients
